# Supplementary material for: Hybrid bio-nanoporous peptide loaded-polymer platforms with anticancer and antibacterial activities
Source: Royal Society of Chemistry journal article supplement (doi:10.1039/d3na00947e), 2024-01-01
Supplement: d3na00947e1.pdf [file d3na00947e1.pdf]

Supplementary data

## Hybrid bio nano-porous peptides loaded- polymer platforms with antitumoral anticancer and antibacterial activity

Madalina Icriverzi<sup>a#</sup>, Paula Ecaterina Florian<sup>a#</sup>, Anca Bonciu<sup>b</sup>, Luminita Nicoleta Dumitrescu<sup>b</sup>, Antoniu Moldovan<sup>b</sup>, Diana Pelinescu<sup>c</sup>, Robertina Ionescu<sup>c</sup>, Ionela Avram<sup>c</sup>, Cristian V.A. Munteanu<sup>a</sup>, Livia Elena Sima<sup>a</sup>, Valentina Dinca<sup>b</sup>, Laurentiu Rusen<sup>b\*</sup> and Anca Roseanu<sup>a\*</sup>

Fig. S1- Experimental set-up for pNIPAM-Co-BA (cop) porous coatings deposition

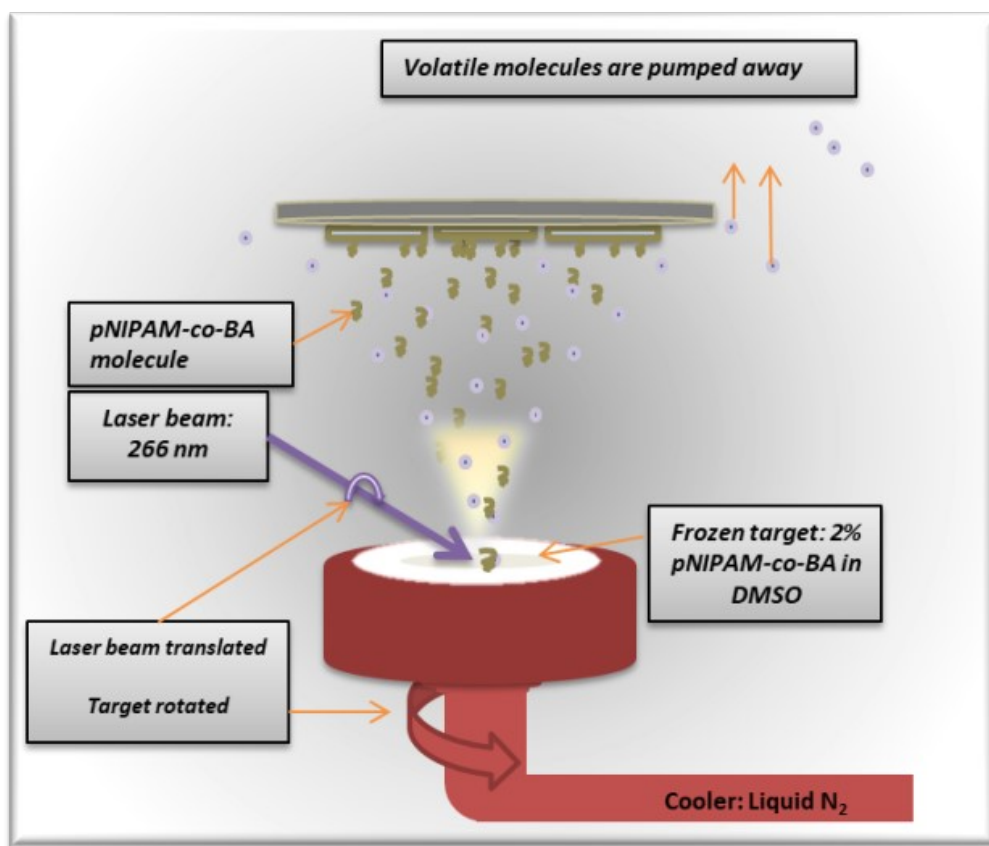

Fig. S2 Half maximal inhibitory concentrations (IC<sub>50</sub>) determined by MTS assay for Mel on HEK293T, A375, B16F1 and B16F10 cells after 24h post-exposure.

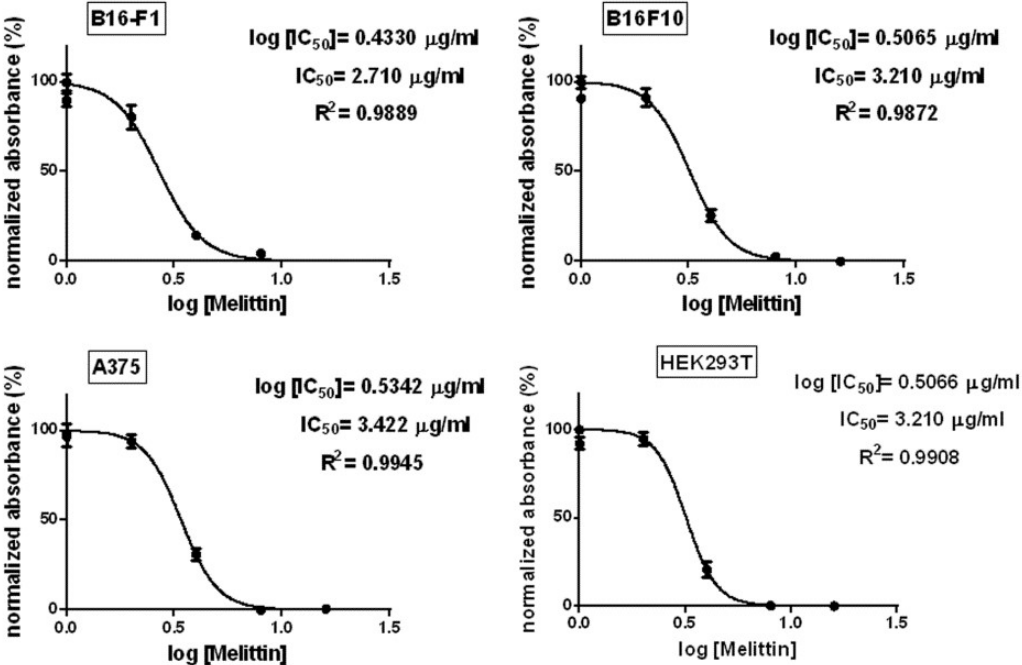

Fig. S3 AFM (A- area 5x5  $\mu\text{m}^2$ , C- area 45x45  $\mu\text{m}^2$ ) and SEM (B-150.000 magnification) images of the copolymer+DMSO layers deposited by MAPLE on Si, at the laser fluence of 350  $\text{mJ}/\text{cm}^2$ , number of pulses (2h) 72000 depicting the pores sizes and coating thickness

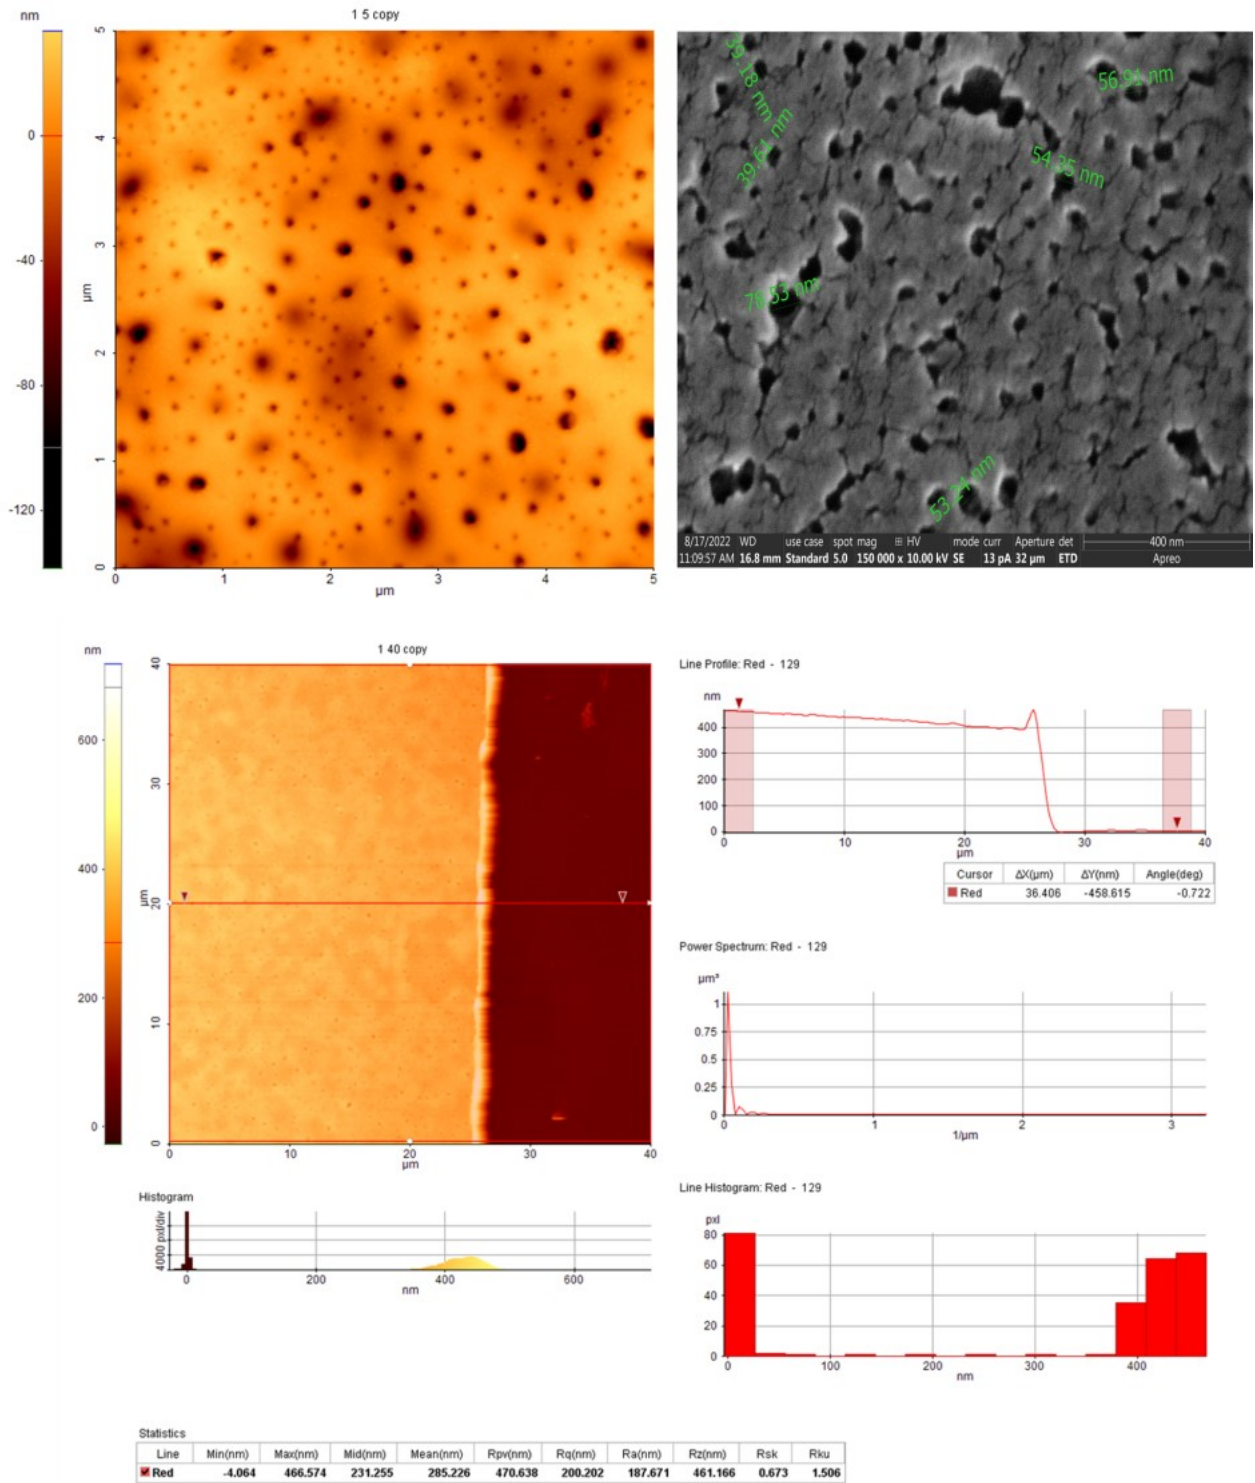

Fig S4. AFM and swelling behaviour profile sequence of pNIPAM-co-BA coatings before, during immersion in solution with pH acid and after removing from the acidic medium.

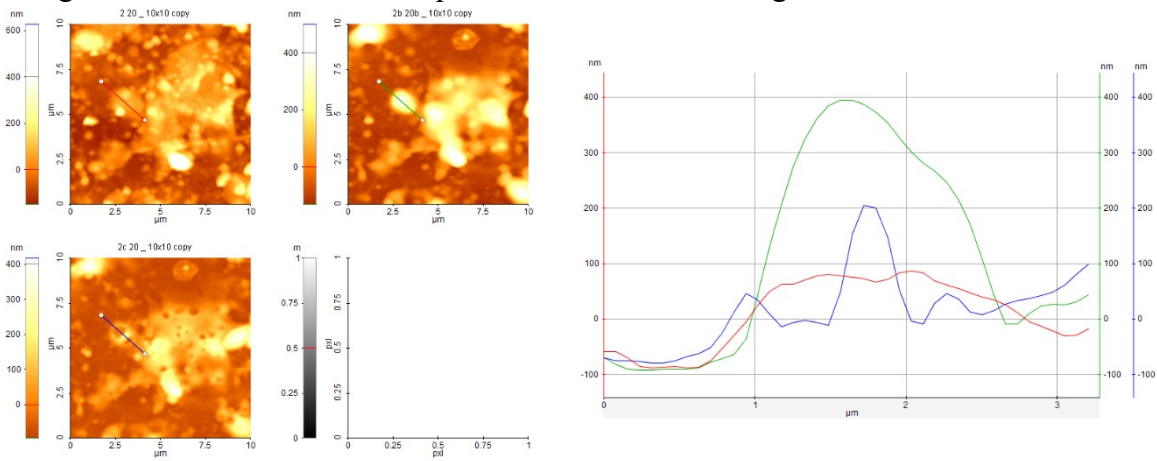

Fig.S5. NanoLC-MS/MS analysis of the samples extracted with PBS from the biomaterials covered with single peptides. A. Extracted ion chromatogram for the  $m/z$  corresponding to the monoisotopic mass of Magainin (extracted - upper panel and the standard - lower panel). B. MS/MS fragmentation pattern for Magainin in the extracted sample (left panel) and the standard (right panel). C&D. Similar for Melittin. E. Spectrophotometric profile of the extracted samples and the standard sample of Melittin.

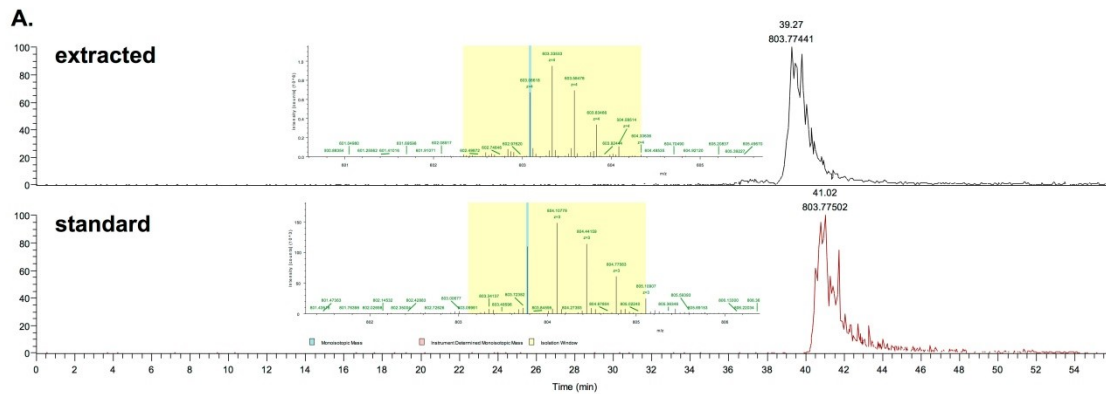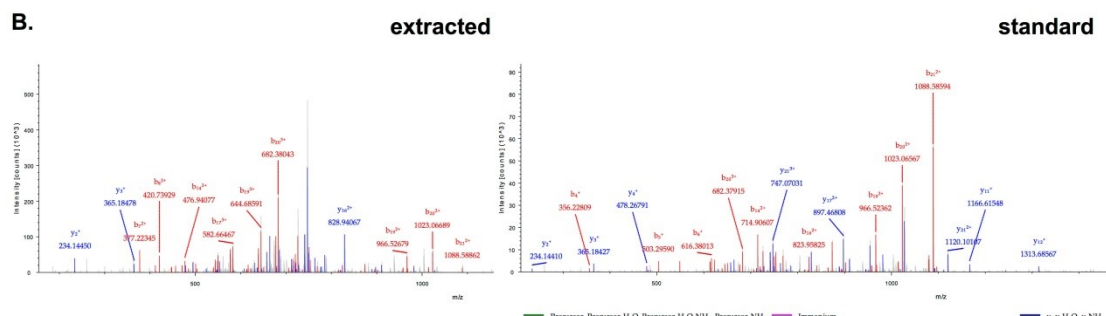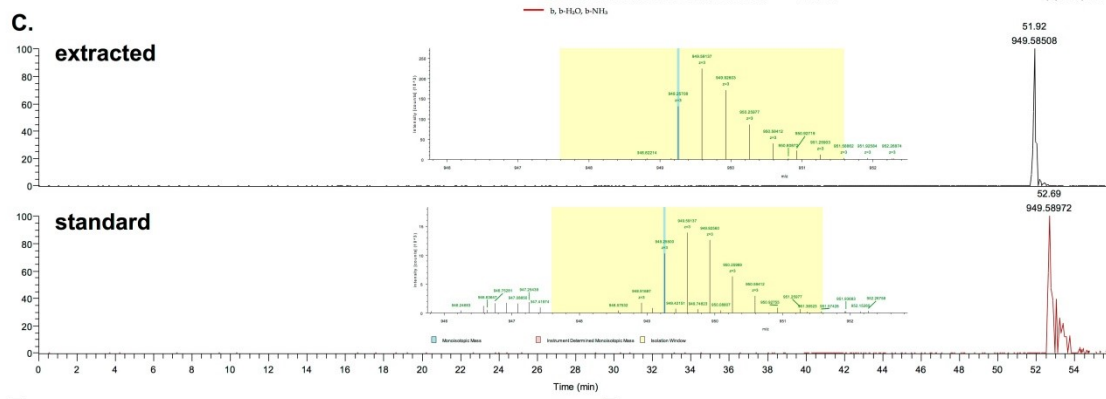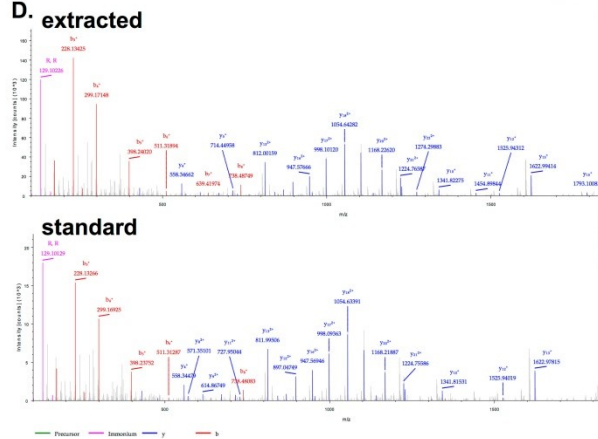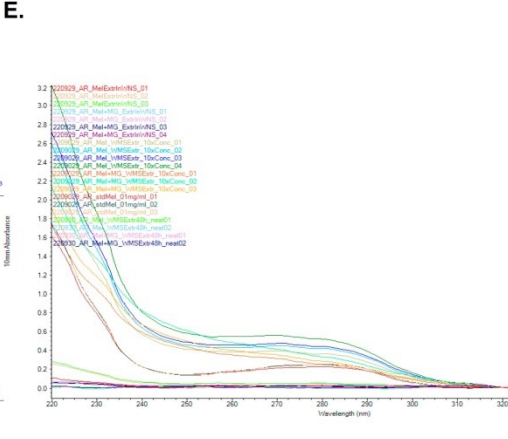

Fig.S6 Histogram profile of cell cycle phases after treatment for 24h with co-polymer matrix eluates

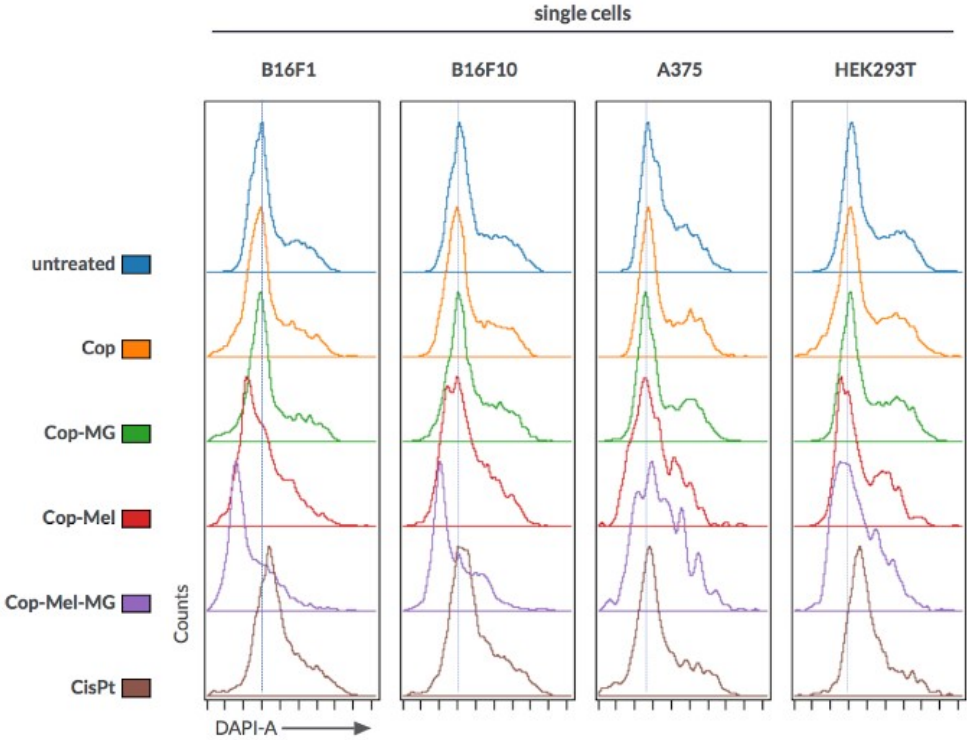



Fig. S57: Flow cytometry scattergram depicting variations in forward and side scatter pulse areas (FSC-A and SSC-A) reflecting the impact of treatments on cell size and granularity. Mathematical gates were drawn to select for intact cell populations and to exclude debris before cell cycle profile analysis. The table figure presents the percent of intact cells in each sample. Relative size variation (FSC profile)

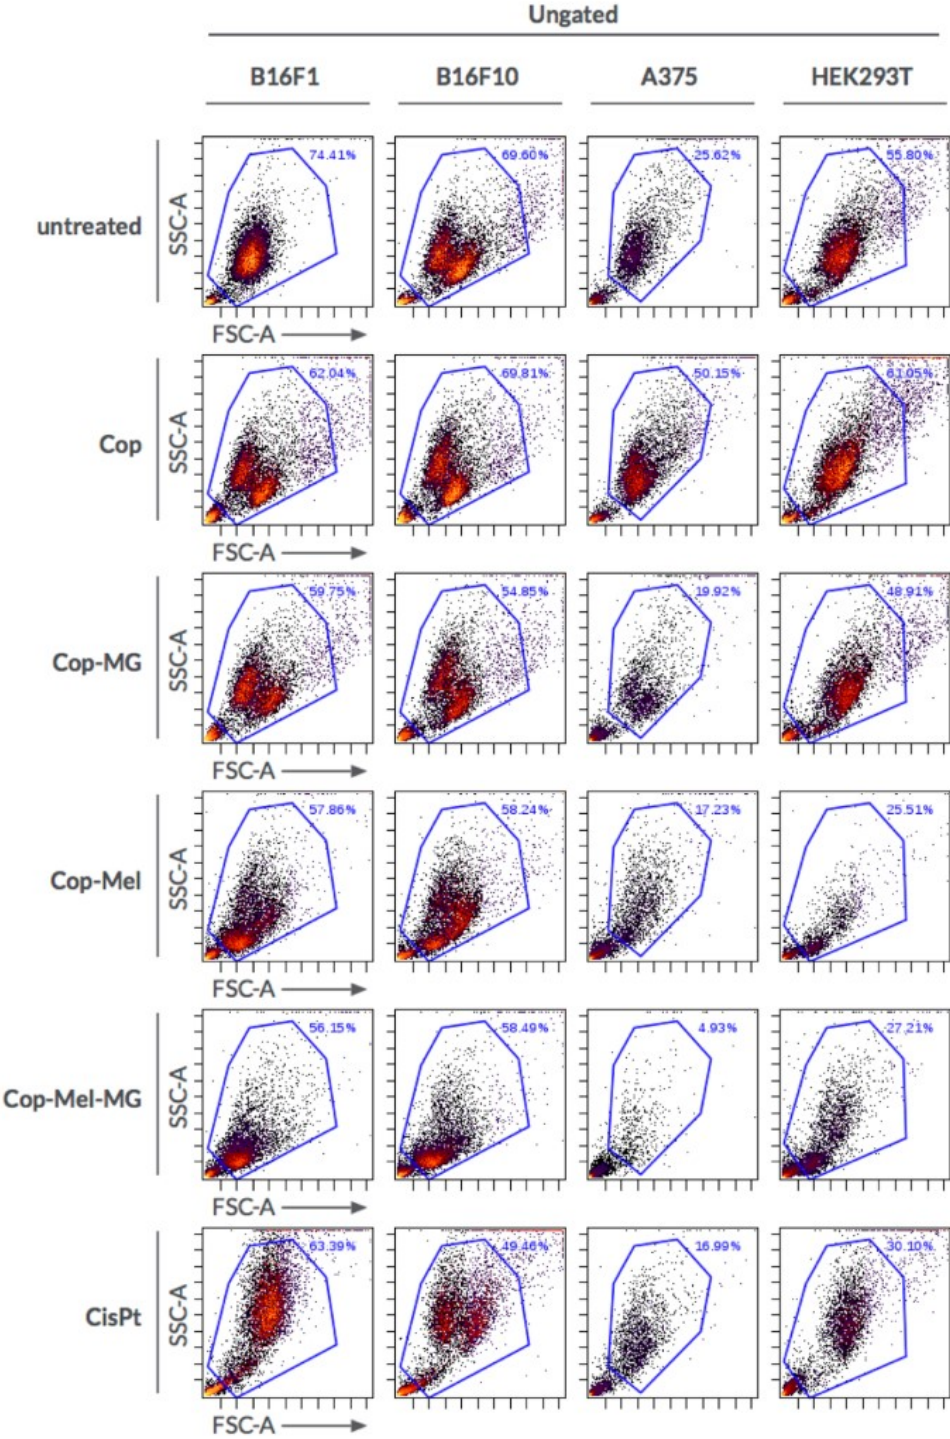

Fig.S68: Flow cytometry histograms depicting relative size variation (FSC profile) in cells treated with co-polymer matrix eluates, cisplatin or left untreated. Histogram color becomes lighter with increase in signal. Table presents median relative size values for intact cells.

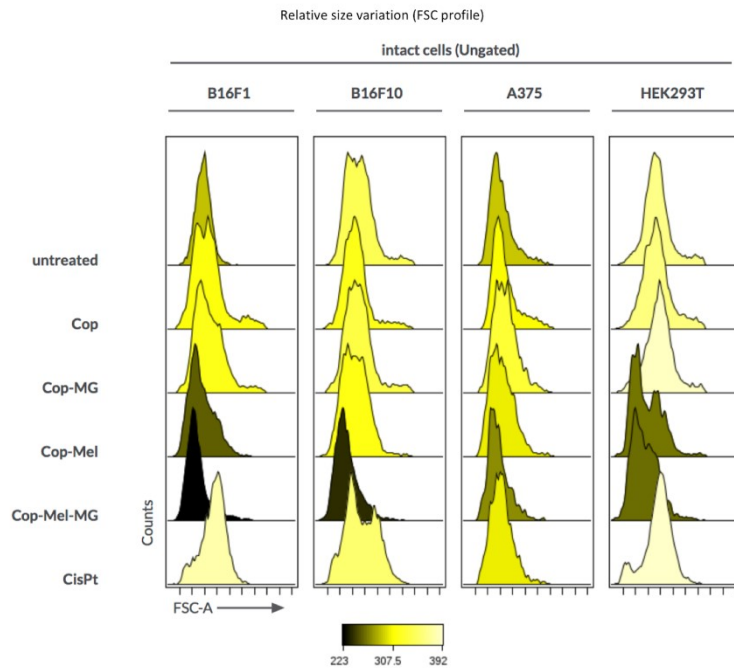

Displaying **Raw** of X channel **FSC-A**

intact cells (Ungated)

|            | B16F1 | B16F10 | A375 | HEK293T |
|------------|-------|--------|------|---------|
| untreated  | 287   | 343    | 289  | 364     |
| Cop        | 313   | 317    | 307  | 361     |
| Cop-MG     | 317   | 337    | 330  | 389     |
| Cop-Mel    | 254.5 | 315    | 302  | 262     |
| Cop-Mel-MG | 223   | 238    | 270  | 259     |
| CisPt      | 380   | 354    | 302  | 392     |



Fig. S79: Flow cytometry histograms depicting relative complexity/granularity variation (SSC profile) in cells treated with co-polymer matrix eluates, cisplatin or left untreated. Histogram color becomes lighter with increase in signal. Table presents median relative complexity values for intact cells.

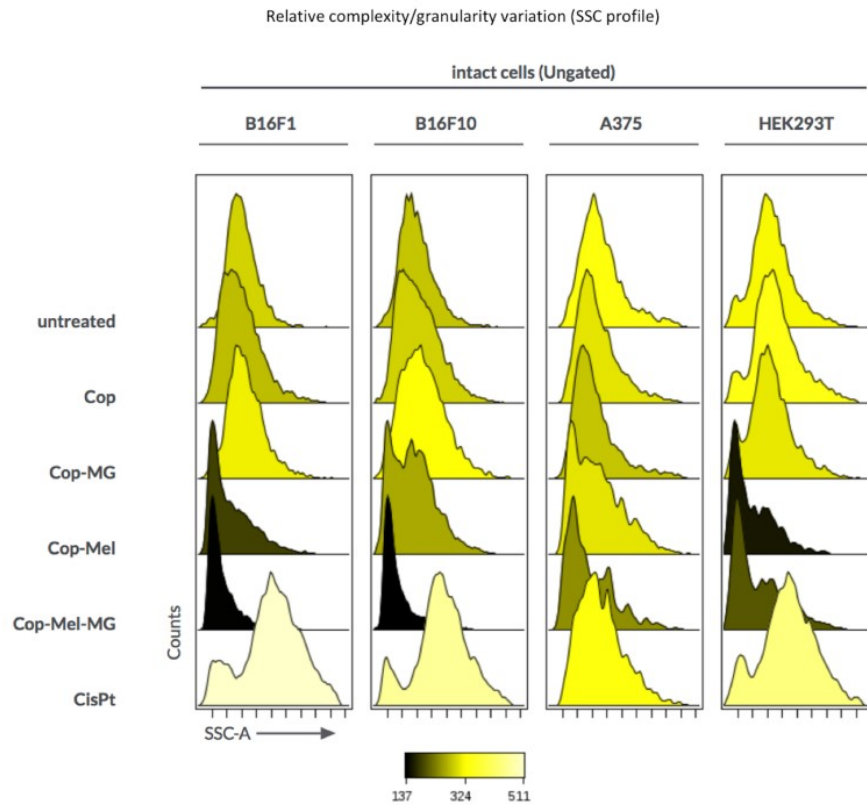

Displaying **Raw** of X channel **SSC-A**

intact cells (Ungated)

|            | B16F1 | B16F10 | A375  | HEK293T |
|------------|-------|--------|-------|---------|
| untreated  | 292   | 282    | 336.5 | 320     |
| Cop        | 276   | 291    | 305   | 343     |
| Cop-MG     | 313   | 325    | 281.5 | 308     |
| Cop-Mel    | 185   | 261    | 305   | 155     |
| Cop-Mel-MG | 139   | 137    | 242   | 201     |
| CisPt      | 511   | 466    | 336   | 441     |
